# Supplementary material for: A postzygotic GNA13 variant upregulates the RHOA/ROCK pathway and alters melanocyte function in a mosaic skin hypopigmentation syndrome
Source: bioRxiv or medRxiv preprint supplement (doi:10.1101/2024.07.24.24310661), 2024-07-24
Supplement: Supplementary file [file media-1.pdf]

| Patient                                                 |                                         | Patient 1                                                                                                                                                 | Patient 2                                                                                                                    | Patient 3                                                                                                     | Patient 4                                                    |
|---------------------------------------------------------|-----------------------------------------|-----------------------------------------------------------------------------------------------------------------------------------------------------------|------------------------------------------------------------------------------------------------------------------------------|---------------------------------------------------------------------------------------------------------------|--------------------------------------------------------------|
| <b>GNA13 Variant</b>                                    | <b>Nomenclature</b>                     | chr17:g.63010910C>T<br>NM_006572.4:c.599G>A<br>p.(Arg200Lys)                                                                                              | chr17:g.63010910C>T<br>NM_006572.4:c.599G>A<br>p.(Arg200Lys)                                                                 | chr17:g.63010910C>T<br>NM_006572.4:c.599G>A<br>p.(Arg200Lys)                                                  | chr17:g.63010910C>T<br>NM_006572.4:c.599G>A<br>p.(Arg200Lys) |
| <b>Tissue VAF*</b>                                      | <b>Affected skin</b>                    | 29.0%                                                                                                                                                     | 30.0%                                                                                                                        | 25.0%                                                                                                         | 36%                                                          |
|                                                         | <b>Blood</b>                            | 0.3% (NS)                                                                                                                                                 | 0.00% (NS)                                                                                                                   | -                                                                                                             | 0.0% (NS)                                                    |
|                                                         | <b>Buccal swab</b>                      | 0.1% (NS)                                                                                                                                                 | 10.6%                                                                                                                        | 3.9%                                                                                                          | 0.5% (NS)                                                    |
|                                                         | <b>Urine</b>                            | 0.0% (NS)                                                                                                                                                 | -                                                                                                                            | 0.1% (NS)                                                                                                     | 0.0% (NS)                                                    |
| <b>Sex</b>                                              | Male                                    | Male                                                                                                                                                      | Female                                                                                                                       | Female                                                                                                        |                                                              |
| <b>Age at last visit</b>                                | 11-15                                   | 21-25                                                                                                                                                     | 0-5                                                                                                                          | 6-10                                                                                                          |                                                              |
| <b>Growth</b>                                           | <b>OFC (cm)</b>                         | 50.5 (-1 SD)                                                                                                                                              | -                                                                                                                            | -                                                                                                             | -                                                            |
|                                                         | <b>Height (cm)</b>                      | 108.5 (-0.5 SD)                                                                                                                                           | -                                                                                                                            | -                                                                                                             | 123 (+ 0.5 SD)                                               |
|                                                         | <b>Weight (kg)</b>                      | 19.0 (M)                                                                                                                                                  | -                                                                                                                            | -                                                                                                             | 22 (M)                                                       |
| <b>Asymmetry<br/>Craniofacial anomalies</b>             | Right-sided hemihypotrophy (lower limb) | Right-sided hemifacial hypoplasia<br>Lower limb asymmetry<br>Plagiocephaly<br>Scoliosis                                                                   | No                                                                                                                           | Right-sided hemifacial hypoplasia                                                                             |                                                              |
| <b>Pregnancy and birth</b>                              | <b>Fetal ultrasonography</b>            | -                                                                                                                                                         | Intrauterine growth retardation                                                                                              | -                                                                                                             | Normal                                                       |
|                                                         | <b>Term</b>                             | 41 wk                                                                                                                                                     | -                                                                                                                            | -                                                                                                             | 39 wk                                                        |
|                                                         | <b>OFC at birth (cm)</b>                | NR                                                                                                                                                        | -                                                                                                                            | -                                                                                                             | 33.5                                                         |
|                                                         | <b>Length at birth (cm)</b>             | 44.0                                                                                                                                                      | -                                                                                                                            | -                                                                                                             | 49.5                                                         |
|                                                         | <b>Weight at birth (g)</b>              | 2500                                                                                                                                                      | -                                                                                                                            | -                                                                                                             | 3560                                                         |
| <b>Skin and hair</b>                                    | <b>Hypopigmentation pattern</b>         | Linear, spindle-shaped, flag-like, splash-like, phylloid                                                                                                  | Linear, spindle-shaped                                                                                                       | Linear, splash-like                                                                                           | Linear, spindle-shaped                                       |
|                                                         | <b>Location of hypopigmentation</b>     | right upper and lower limbs, trunk                                                                                                                        | Lower limbs bilaterally, face (chin)                                                                                         | Left lower limb                                                                                               | Right upper limb                                             |
|                                                         | <b>Hair anomalies</b>                   | Absence of hair on hypopigmented skin                                                                                                                     | Patchy alopecia of scalp hair and right eyelashes                                                                            | NR                                                                                                            | Patchy alopecia on parietal scalp and right eyelashes        |
|                                                         | <b>Wound healing</b>                    | Delayed wound closure (9 months) after skin biopsy (right upper limb)                                                                                     | Delayed wound closure after skin biopsy (1 month) and after excision of supernumerary digit of the right hand (2 - 3 months) | NR                                                                                                            | NR                                                           |
| <b>Neurology</b>                                        | <b>Peripheral nerves</b>                | Right foot dysaesthesia and weakness                                                                                                                      | NR                                                                                                                           | NR                                                                                                            | NR                                                           |
|                                                         | <b>Brain MRI</b>                        | White matter hyperintensities (centrum semiovale, right parietal lobe and temporoparietal junction, left frontal lobe)                                    | Hydrocephalus                                                                                                                | Normal (at age 6 mo.)                                                                                         | Not performed                                                |
| <b>Acral anomalies</b>                                  | Camptodactyly                           | Right hand polysyndactyly<br>Left hand brachymetacarpus<br>Bilateral pes planus (partial talocalcaneal fusion)<br>Toe syndactyly (right foot)             | Left foot polysyndactyly                                                                                                     | No                                                                                                            |                                                              |
| <b>Ocular anomalies</b>                                 | No                                      | Coloboma of upper eyelid, bilateral abnormal fundus                                                                                                       | Mild iris coloboma                                                                                                           | Amblyopia with mild microphthalmia of right eye<br>Narrow palpebral fissure of right eye<br>Normal eye fundus |                                                              |
| <b>Dental anomaly</b>                                   | No                                      | Odontogenic cysts, dental anomalies                                                                                                                       | NR                                                                                                                           | Conical teeth                                                                                                 |                                                              |
| <b>Hearing loss</b>                                     | No                                      | Mixed hypoacusis of right ear (hearing aid)<br>Otosclerosis<br>Abnormal inner auditory and cochlear nerve canals<br>Cochlear nerve agenesis or hypoplasia | Left ear hypoacusis<br>Chronic otitis media                                                                                  | No                                                                                                            |                                                              |
| <b>Gastrointestinal tract anomalies</b>                 | No                                      | Jejunal atresia                                                                                                                                           | Colonic atresia (ascending colon)                                                                                            | Colonic atresia                                                                                               |                                                              |
| <b>Urinary tract anomalies</b>                          | No                                      | Bilateral hydronephrosis, right megaureter                                                                                                                | No                                                                                                                           | No                                                                                                            |                                                              |
| VAF: variant allele frequency                           |                                         |                                                                                                                                                           |                                                                                                                              |                                                                                                               |                                                              |
| * Targeted ultradeep sequencing (TUDS) on affected skin |                                         |                                                                                                                                                           |                                                                                                                              |                                                                                                               |                                                              |
| NR : not reported                                       |                                         |                                                                                                                                                           |                                                                                                                              |                                                                                                               |                                                              |
| (-) missing data                                        |                                         |                                                                                                                                                           |                                                                                                                              |                                                                                                               |                                                              |
| NS: not significant (below background noise threshold)  |                                         |                                                                                                                                                           |                                                                                                                              |                                                                                                               |                                                              |
